# Supplementary material
Source: HighWire-hosted journal article supplement (https://adc.bmj.com/content/103/10/988)
Supplement: inline-supplementary-material-1 [file inline-supplementary-material-1.pdf]

## Search strategy and outcome

MEDLINE via Ovid (1946 to June 3 2017), Embase via Ovid (1974 to July 11 2017) and the Maternity and Infant Care Database (1971 to June 2017) were searched for relevant articles.

Slight variations in search strategies for all database were used. They are demonstrated in the tables below.

### MEDLINE via Ovid

| # | Searches                               | Results |
|---|----------------------------------------|---------|
| 1 | (Cytomegalovirus or CMV).mp            | 52159   |
| 2 | (PCR or polymerase chain reaction).mp. | 720186  |
| 3 | Saliva*.mp                             | 107312  |
| 4 | (newborn* or neonat* or infant*).mp.   | 1358580 |
| 5 | 1 and 2 and 3 and 4                    | 71      |
| 6 | Hearing.mp.                            | 115166  |
| 7 | 5 and 6                                | 24      |
| 8 | Early.mp.                              | 1344697 |
| 9 | 5 and 8                                | 22      |

### Embase via Ovid

| # | Searches                               | Results |
|---|----------------------------------------|---------|
| 1 | (CMV or cytomegalovirus).mp.           | 79050   |
| 2 | (PCR or polymerase chain reaction).mp. | 939586  |
| 3 | Saliva*.mp.                            | 122973  |
| 4 | (newborn* or neonat* or infant*).mp.   | 1269260 |
| 5 | 1 and 2 and 3 and 4                    | 102     |

### Maternity and Infant Care Database

| # | Searches                               | Results |
|---|----------------------------------------|---------|
| 1 | (cmv or cytomegalovirus).mp.           | 744     |
| 2 | (pcr or polymerase chain reaction).mp. | 1821    |
| 3 | Saliva*.mp.                            | 436     |
| 4 | (newborn* or neonat* or infant*).mp.   | 95925   |
| 5 | 1 and 2 and 3 and 4                    | 11      |

A total of 184 articles were identified, and 1 additional article identified through other sources. After duplicates were removed 124 articles were screened by title and abstract. 29 full-text articles were subsequently reviewed and 6 were included as relevant to the structured clinical question.
